# Supplementary material for: A Comprehensive and Systematic Analysis Revealed the Role of ADAR1 in Pan-Cancer Prognosis and Immune Implications
Source: Hindawi journal article supplement (doi:10.1155/2023/7620181), 2023-02-21
Supplement: f1 [file 7620181.f1.pdf]

## Supplementary Figure

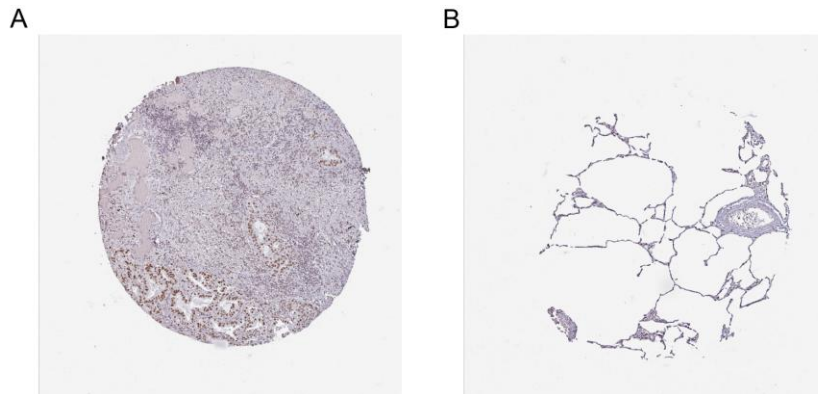

### Supplementary Figure1. Protein levels of ADAR1 in lung-cancer

(A) Expression level of ADAR1 protein in lung cancer tissues. (B) Protein expression of ADAR1 in normal lung tissue.
